# Supplementary material
Source: bioRxiv or medRxiv preprint supplement (https://www.biorxiv.org/highwire/filestream/10968/field_highwire_adjunct_files/1/040386-2.pdf)

# Dengue Ensemble Model under Current Climate Conditions

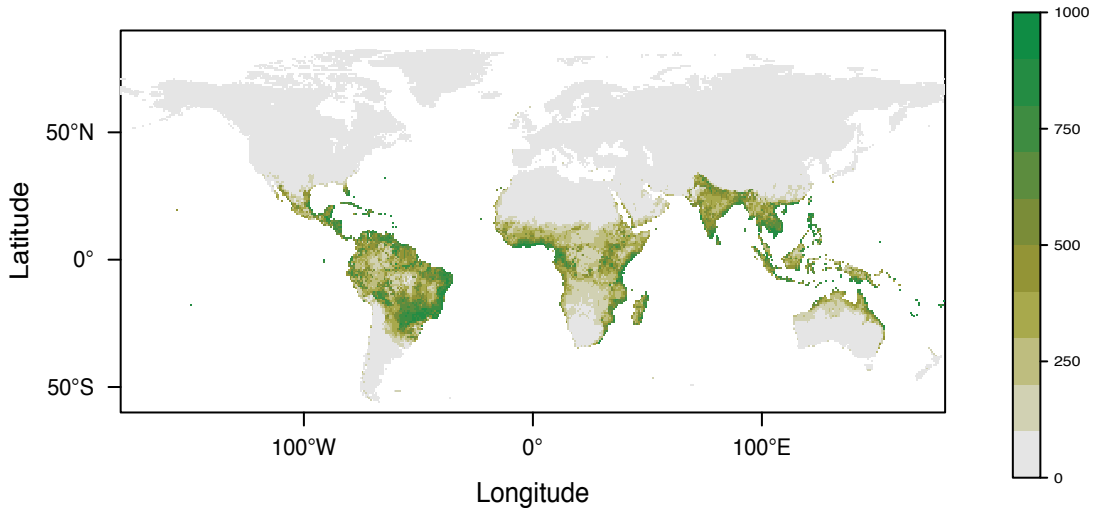

Supplement: Supplementary file [file 040386-2.pdf]
